# Supplementary material for: Diatom and radiolarian biostratigraphy in the Pliocene sequence of ODP Site 697 (Jane Basin, Atlantic sector of the Southern Ocean)
Source: Copernicus journal article supplement (doi:10.5194/jm-43-93-2024), 2024-05-17
Supplement: Supplementary file 1 [file jm-43-93-2024-supplement.pdf]

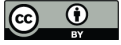

*Supplement of*

## **Diatom and radiolarian biostratigraphy in the Pliocene sequence of ODP Site 697 (Jane Basin, Atlantic sector of the Southern Ocean)**

**Yuji Kato et al.**

*Correspondence to:* Yuji Kato ([yuji.kato@kochi-u.ac.jp](mailto:yuji.kato@kochi-u.ac.jp))

The copyright of individual parts of the supplement might differ from the article licence.

## Species list

To indicate the taxonomic concept of the authors, the references used for species identification are presented below.

### Diatoms

- Actinocyclus actinochilus* (Ehrenberg) Simonsen; Harwood and Maruyama, 1992, p. 699, pl. 12, figs. 9–11; Iwai and Winter, 2002, p. 3, pl. 26, fig. 2, pl. 33, fig. 1; Scott and Thomas, 2005, p. 52, fig. 2.22.
- Actinocyclus curvatus* Janisch; Fenner et al., 1976, p. 763, pl. 6, figs. 1, 2; Akiba, 1982, p. 41–42, pl. 5, figs. 5a, 5b; Harwood and Maruyama, 1992, p. 699, pl. 12, fig. 12; Zielinski and Gersonde, 2002, p. 253, pl. 3, fig. 1.
- Actinocyclus ingens* Rattray; Gombos, 1977, p. 591–592; Akiba, 1982, p. 42, pl. 5, figs. 7–14; Gersonde, 1990, p. 791–792, pl. 1, figs. 1, 3–5, pl. 3, figs. 8, 9, pl. 4, fig. 1; Harwood and Maruyama, 1992, p. 700, pl. 8, fig. 10; pl. 11, figs. 4, 6; pl. 12, fig. 8.
- Actinocyclus karstenii* Van Heurck; Harwood and Maruyama, 1992, p. 700, pl. 13, figs. 1, 2, 6–8, 10, 11, 13; Censarek and Gersonde, 2002, p. 350, pl. 1, fig. 5; Iwai and Winter, 2002, p. 3, pl. P20, figs. 5–8; pl. P24, fig. 8; pl. P26, fig. 1; pl. P27, fig. 9; Zielinski and Gersonde, 2002, p. 253, pl. 3, figs. 4, 5, 7–9, 12.
- Actinocyclus maccollumii* Harwood and Maruyama, 1992, p. 700, pl. 17, fig. 29, Zielinski and Gersonde, 2002, p. 253, pl. 3, figs. 10, 11, 13–15. **Synonym.** *Coscinodiscus?* sp. 3, in McCollum, 1975, p. 527, pl. 7, figs. 1–4.
- Actinocyclus octonarius* Ehrenberg; Iwai and Winter, 2002, p. 3, pl. P20, fig. 3. **Synonym:** *Actinocyclus ehrenbergii* Ralfs; Schrader, 1973, p. 701, pl. 19, fig. 1.
- Azpeitia tabularis* (Grunow) Fryxell et Sims in Fryxell et al., 1986, p. 16, figs. 14-1A–14-3B, 15-1A–15-4B, 30-1; Harwood and Maruyama, 1992, p. 701, pl. 11, fig. 5; Censarek and Gersonde, 2002, p. 350, pl. 1, fig. 7; Iwai and Winter, 2002, p. 4, pl. P21, fig. 4; Zielinski and Gersonde, 2002, p. 255, pl. 3, fig. 2. **Basionym:** *Coscinodiscus tabularis* Grunow; Akiba, 1982, p. 42, pl. 2, figs. 6–9.
- Chaetoceros* spp. (observed in the form of resting spores)
- Cocconeis costata* Gregory; Akiba, 1986, p. 447, pl. 30, fig. 1; Harwood et al., 2000, p. 459, fig. 9h; Iwai and Winter, 2002, p. 4, pl. P6, fig. 16.
- Cocconeis fasciolata* (Ehrenberg) Brown; Scott and Thomas, 2005, p. 127, fig. 2.68; Al-Handal and Wulff, 2008, fig. 37.
- Corethron pennatum* (Grunow) Ostenfeld; Scott and Thomas, 2005, p. 65, fig. 2.29.
- Coscinodiscus asteromphalus* Ehrenberg; Scott and Thomas, 2005, p. 38, fig. 2.15.
- Coscinodiscus marginatus* Ehrenberg; McCollum, 1975, p. 527, pl. 16, figs. 2, 3; Gombos, 1977, p. 593, pl. 5, fig. 5; Akiba, 1982, p. 42, pl. 1, fig. 8; Akiba, 1986, p. 442, pl. 1, figs. 1–4; Iwai and Winter, 2002, p. 5, pl. P30, fig. 2; pl. P31, fig. 5.
- Coscinodiscus radiatus* Ehrenberg; Fenner et al., 1976, p. 774, pl. 7, fig. 1; Iwai and Winter, 2002, p. 5, pl. P22, fig. 1.

- Denticulopsis crassa* Yanagisawa and Akiba, 1990, p. 248–249, pl. 3, figs. 21–27, pl. 12, figs. 1–8; Censarek and Gersonde, 2002, p. 351, pl. 2, fig. 12; Iwai and Winter, 2002, p. 5, pl. P1, figs. 15–18. **Synonym:** *Denticula hustedtii* Simonsen and Kanaya, Schrader, 1973, pl. 2, figs. 29, 30; *Denticulopdis hustedtii* (Simonsen and Kanaya) Simonsen, Akiba, 1986, pl. 28, figs. 5, 9, 14, 15, 18; Akiba and Yanagisawa, 1986, pl. 17, figs. 9, 10, 20.
- 35 *Denticulopsis delicata* Yanagisawa and Akiba, 1990, p. 246, pl. 7, figs. 1–4; Iwai and Winter, 2002, p. 5, pl. 2, figs. 9–16, pl. 28, figs. 3–5.
- Denticulopsis dimorpha* (Schrader) Simonsen; Akiba, 1982, pl. 11, figs. 1, 3, 5, 6, *nec* 2–4, 7, 8; Akiba, 1986, p. 442, pl. 27, figs. 3, 4, 7–9, 11–13, *nec* 1, 2, 5, 6, 10; Akiba and Yanagisawa, 1986, p. 488, pl. 15, figs. 2–4, 17, 18, 20, 23–25, *nec* 1, 5–16, 19, 21, 22, pl. 16, figs. 1–16; Yanagisawa and Akiba, 1990, p. 254–255, pl. 4, figs. 42–49, pl. 7, figs. 14–16.
- 40 *Denticulopsis dimorpha* var. *areolata* Yanagisawa and Akiba, 1990, p. 257, pl. 4, figs. 40, 41, 50–54, pl. 5, figs. 13–17, pl. 6, fig. 1–5, 15–23, pl. 12, figs. 15, 16. **Synonym:** *Denticulopsis dimorpha* (Schrader) Simonsen; Akiba, 1982, pl. 11, figs. 2–4, 7, 8; Akiba, 1986, pl. 27, figs. 1, 2, 5, 6, 10; Ciesielski, 1986, p. 876, pl. 2, figs. 5–8; Akiba and Yanagisawa, 1986, pl. 15, figs. 1, 5–16, 19, 21, 22, pl. 16, figs. 1–16; Baldauf and Barron, 1991, p. 588, pl. 7, fig. 4.
- Denticulopsis hyalina* (Schrader) Simonsen; Akiba, 1986, pl. 26, figs. 20–25; Akiba and Yanagisawa, 1986, pp. 488, 489, pl. 10, figs. 1–11, 14–16; pl. 11, figs. 1–10; pl. 12, figs. 1–5; Yanagisawa and Akiba, 1990, pp. 240, 241, pl. 2, figs. 14, 33, 34; pl. 9, figs. 8, 9.
- 45 *Denticulopsis ovata* (Schrader) Yanagisawa and Akiba, 1990, pp. 257, 258, pl. 6, figs. 6–14, 24–32; Censarek and Gersonde, 2002, p. 351, pl. 2, figs. 13–20; Iwai and Winter, 2002, p. 6, pl. 1, fig. 20. **Basionym:** *Denticula hustedtii* var. *ovata* Schrader, 1976, p. 632, pl. 4, figs. 5, 6, 12, 14, 15.
- 50 *Denticulopsis praedimorpha* Barron ex Akiba, 1982, p. 46–48, pl. 11, figs. 9–27; Yanagisawa and Akiba, 1990, pl. 4, figs. 3–5, 10, 12–17, 39, pl. 5, figs. 4–12.
- Denticulopsis simonsenii* Yanagisawa and Akiba, 1990, pp. 242, 243, pl. 3, figs. 1–3; pl. 11, figs. 1, 5; Censarek and Gersonde, 2002, p. 351, pl. 2, figs. 21–24; Iwai and Winter, 2002, pl. 1, figs. 1–6; pl. 28, figs. 1, 2.
- Denticulopsis vulgaris* (Okuno) Yanagisawa and Akiba, 1990, pp. 243, 244, pl. 3, figs. 4–8; pl. 11, figs. 2, 6–10; Iwai and Winter, 2002, p. 6, pl. P1, figs. 7, 8.
- 55 *Eucampia antarctica* (Castracane) Mangin; Harwood et al., 2000, p. 459, figs. 7r, 7s; Iwai and Winter, 2002, pl. 7, fig. 12; pl. 27, fig. 6.
- Fragilariopsis arcula* (Gersonde) Gersonde and Bárcena, 1998, p. 92. **Basionym:** *Nitzschia arcula* Gersonde, 1991, p. 143–144, pl. 2, fig. 4, pl. 4, fig. 4, pl. 5, figs. 1–6; Gersonde and Burckle, 1990, p. 780, pl. 1, figs. 25, 26.
- 60 *Fragilariopsis aurica* (Gersonde) Gersonde and Bárcena, 1998, p. 92; Censarek and Gersonde, 2002, p. 351, pl. 3, figs. 9–12; Iwai and Winter, 2002, pp. 6, 7, pl. 4, figs. 24–28, pl. 25, fig. 2, pl. 28, fig. 7; Zielinski and Gersonde, 2002, p. 257, pl. 1, figs. 13–15. **Basionym:** *Nitzschia aurica* Gersonde, 1991, pp. 144–146, pl. 1, figs. 18–25, pl. 3, fig. 5, pl. 4, figs. 5, 6, pl. 7, fig. 6; Gersonde and Burckle, 1990, p. 780, pl. 2, figs. 10–12; Harwood and Maruyama, 1992, p. 704, pl. 17, figs. 21–23.

- Fragilariopsis barronii* (Gersonde) Gersonde and Bárcena, 1998, p. 92; Harwood et al., 2000, p. 459, fig. 10m; Iwai and Winter, 2002, p. 7, pl. 25, fig. 3; Zielinski and Gersonde, 2002, p. 257, pl. 1, figs. 29–31. **Basionym:** *Nitzschia barronii* Gersonde, 1991, pp. 146, 147, pl. 3, fig. 6, pl. 4, figs. 1–3, pl. 5, figs. 7–17; Gersonde and Burckle, 1990, p. 780, pl. 1, figs. 11–13; Baldauf and Barron, 1991, p. 589, pl. 7, fig. 14; Harwood and Maruyama, 1992, p. 704, pl. 17, figs. 27, 28.
- Fragilariopsis bohaty* Sjunneskog and Riesselman in Sjunneskog et al., 2012, p. 275–277, pl. 3, figs. a–x, pl. 4, figs. a–i. **Synonym:** *Fragilariopsis* sp. of Bohaty et al., 1998, pl. 1, figs. 11, 13.
- 70 *Fragilariopsis curta* (Van Heurck) Hustedt; Bohaty et al., 1998, pl. 4, fig. 3; Harwood et al., 2000, p. 459, fig. 10. **Synonym:** *Nitzschia curta* (Van Heurck) Hasle; Schrader, 1976, p. 633, pl. 5, figs. 21, 23, 24; Fenner et al., 1976, p. 775, pl. 4, figs. 5–9; Akiba, 1982, p. 44, pl. 10, figs. 1–2b; Koizumi, 1982, p. 80, pl. 1, figs. 1, 2; Hasle and Medlin, 1990, p. 181–182, pl. 24.6, figs. 2–5; Harwood and Maruyama, 1992, p. 704, pl. 17, figs. 1–4.
- Fragilariopsis cylindrus* (Grunow) Krieger; **Basionym:** *Nitzschia cylindrus* (Grunow) Hasle; Fenner et al., 1976, p. 775, pl. 4, 75 figs. 10–15; Hasle and Medlin, 1990, p. 181–182, pl. 24.6, figs. 6–12.
- Fragilariopsis interfrigidaria* (McCollum) Gersonde and Bárcena, 1998, p. 92; Iwai and Winter, 2002, p. 7, pl. 3, figs. 16, 17; pl. 25, figs. 6–8; Zielinski and Gersonde, 2002, p. 259, pl. 1, figs. 20, 21. **Basionym:** *Nitzschia interfrigidaria* McCollum, 1975, p. 535, pl. 9, fig. 9; Schrader, 1976, p. 634, pl. 3, figs. 5, 6; Gombos, 1977, p. 595, pl. 7, fig. 3; Ciesielski, 1983, p. 655, pl. 1, figs. 11–18; Ciesielski, 1986, p. 876, pl. 3, figs. 6, 7; Gersonde and Burckle, 1990, p. 780, pl. 1, figs. 1–3.
- 80 *Fragilariopsis laqueata* Riesselman in Sjunneskog et al., 2012, p. 274–275, pl. 1, figs. a–w, pl. 2, figs. a–i.
- Fragilariopsis praeurta* (Gersonde) Gersonde and Bárcena, 1998, p. 92; Iwai and Winter, 2002, p. 7, pl. P4, figs. 19–23; pl. P28, fig. 8. **Basionym:** *Nitzschia praeurta* Gersonde, 1991, p. 148–149, pl. 1, figs. 7–17, pl. 2, figs. 5, 6, pl. 3, figs. 3, 4, pl. 10, fig. 7; Gersonde and Burckle, 1990, p. 782, pl. 1, figs. 21–24; Harwood and Maruyama, 1992, p. 704, pl. 17, figs. 25, 26.
- 85 *Fragilariopsis praeinterfrigidaria* (McCollum) Gersonde and Bárcena, 1998, p. 92; Censarek and Gersonde, 2002, p. 352, pl. 3, figs. 22, 23; Iwai and Winter, 2002, p. 7, pl. P3, figs. 13–15; Zielinski and Gersonde, 2002, p. 259, pl. 1, figs. 22, 23. **Basionym:** *Nitzschia praeinterfrigidaria* McCollum, 1975, p. 535, pl. 10, fig. 1; Gombos, 1977, p. 595, pl. 7, figs. 1, 2; Ciesielski, 1983, p. 655, pl. 2, figs. 1–8, 13, 14, pl. 3, fig. 5; Gersonde and Burckle, 1990, p. 782, pl. 1, figs. 4–10; Baldauf and Barron, 1991, p. 589, pl. 7, fig. 12.
- 90 *Fragilariopsis robusta* Sjunneskog in Sjunneskog et al., 2012, p. 277–278, pl. 5, figs. a–i, pl. 6, figs. a–i.
- Fragilariopsis sublinearis* (Van Heurck) Heiden and Kolbe; Bohaty et al., 1998, pl. 1, figs. 15–17. **Synonym:** *Nitzschia sublineata* Hasle; Hasle and Medlin, 1990, p. 181–182, pl. 24.3, fig. 1, pl. 24.5, figs. 1–10, pl. 24.6, fig. 1.
- Fragilariopsis weaveri* (Ciesielski) Gersonde and Bárcena, 1998, p. 93; Ciesielski, 1983, p. 655, pl. 1, figs. 1–10; Zielinski and Gersonde, 2002, p. 260, pl. 1, figs. 18, 19.
- 95 *Grammatophora* spp.
- Hemidiscus cuneiformis* Wallich; Fenner et al., 1976, p. 774, pl. 11, fig. 17; Harwood and Maruyama, 1992, p. 703, pl. 11, fig.

- 11; Censarek and Gersonde, 2002, p. 352, pl. 4, fig. 5; Iwai and Winter, 2002, p. 8, pl. 21, fig. 2; Zielinski and Gersonde, 2002, p. 260, pl. 4, figs. 9, 10.
- Hemidiscus karstenii* Jousé; McCollum, 1975, p. 535, pl. 9, figs. 3, 4; Schrader, 1976, p. 632, pl. 14, fig. 2, pl. 15, figs. 17, 18; Gombos, 1977, p. 595, pl. 4, fig. 8; Ciesielski, 1983, p. 656; Censarek and Gersonde, 2002, p. 352, pl. 3, fig. 27; Iwai and Winter, 2002, p. 8, pl. P21, fig. 5; Zielinski and Gersonde, 2002, p. 260, pl. 4, fig. 8.
- Nitzschia denticuloides* Schrader, 1976, p. 633, pl. 3, figs. 7–8, 10, 12, 18–24; Harwood and Maruyama, 1992, p. 704, pl. 8, figs. 5–8, 17, pl. 9, figs. 24–26, pl. 10, fig. 1.
- Paralia* spp.
- 105 *Proboscia alata* (Brightwell) Sundström, 1986, pp. 99, 100, figs. 258–266; Iwai and Winter, 2002, p. 9, pl. p5, fig. 21. **Basionym:** *Rhizosolenia alata* Brightwell; Fenner et al., 1976, p. 778, pl. 13, fig. 1; Akiba, 1986, p. 444, pl. 18, fig. 6; Harwood and Maruyama, 1992, pl. 18, figs. 15, 17.
- Proboscia barboi* (Brun) Jordan and Priddle, 1991, p. 56, figs. 1, 2; Harwood et al., 2000, p. 460, fig. 8d; Iwai and Winter, 2002, p. 9. **Basionym:** *Rhizosolenia barboi* (Brun) Tempère et Peragallo; McCollum, 1975, p. 535, pl. 11, fig. 13; Schrader, 1976, p. 635, pl. 9, figs. 11–13; Akiba, 1986, p. 444, pl. 18, fig. 2; Ciesielski, 1986, p. 877, pl. 3, fig. 22; *Simonseniella barboi* (Brun) Fenner, 1991, p. 108, pl. 3, figs. 1, 3; Harwood and Maruyama, 1992, p. 706, pl. 11, fig. 13.
- Rhizosolenia antennata* f. *semispina* Sundström, 1986, p. 44, figs. 20, 114, 116–118; Hasle and Syvertsen, 1996, p. 149; Armand and Zielinski, 2001, pp. 271–276, figs. 3D, 3E. **Synonym:** *Rhizosolenia styliiformis* Brightwell sensu Schrader, 1976, p. 635, pl. 9, fig. 4; Harwood and Maruyama, 1992, p. 705, pl. 18, fig. 20.
- 115 *Rhizosolenia costata* Gersonde, 1991, p. 149–150, pl. 9, figs. 1–6, pl. 10, figs. 1–6; Gersonde and Burckle, 1990, p. 782, pl. 3, fig. 6; Harwood and Maruyama, 1992, p. 705, pl. 18, figs. 1, 2.
- Rhizosolenia crassa* Schimper; Armand and Zielinski, 2001, p. 282, figs. 3J, 3K.
- Rhizosolenia harwoodii* Winter in Winter et al., 2012, p. 72, fig. 5.18. **Synonym:** *Rhizosolenia* sp. D of Harwood and Maruyama, 1992, pl. 18, figs. 7–10; *Rhizosolenia* sp. A. of Akiba, 1986, pl. 18, fig. 11.
- 120 *Rhizosolenia polydactyla* Castracane; Sundström, 1986, p. 24, figs. 7–9, 70–72, 74, 76, 77, 79; Hasle and Syvertsen, 1996, p. 150, pl. 27; Armand and Zielinski, 2001, pp. 281, 282, figs. 3F–3I. **Synonym:** *Rhizosolenia styliiformis* Brightwell sensu Fenner et al., 1976, p. 779, pl. 13, fig. 3 nec 4, 5, 9.
- Rouxia antarctica* Heiden and Kolbe; Hanna, 1930, p. 185, pl. 14, fig. 8; Schrader, 1976, p. 635, pl. 5, figs. 1–8; Gombos, 1977, p. 596, pl. 7, fig. 12; Ciesielski, 1983, p. 656; Harwood and Maruyama, 1992, p. 705, pl. 17, fig. 24.
- 125 *Rouxia constricta* Zielinski and Gersonde, 2002, p. 251, pl. 2, figs. 11–19; Zielinski et al., 2002, pl. 1, figs. 8–14. **Synonym:** *Rouxia isopolica* Schrader sensu Akiba, 1982, p. 45, pl. 8, figs. 1–4, 6, 7.
- Rouxia diploneides* Schrader, 1973, p. 710, pl. 3, figs. 24, 25; McCollum, 1975, p. 535, pl. 11, figs. 11, 12; Harwood and Maruyama, 1992, p. 705, pl. 17, fig. 12; Iwai and Winter, 2002, p. 10, pl. 5, fig. 8.
- Rouxia heteropolara* Gombos, 1974, p. 275; Gersonde and Burckle, 1990, p. 782, pl. 5, fig. 2.

- 130 *Rouxia isopolica* Schrader, 1976, p. 635, 636, pl. 5, figs. 9, 14, 15, 20; Akiba, 1982, p. 45, pl. 8, fig. 5 *nec* 1–4, 6, 7.  
*Rouxia leventerae* Bohaty et al., 1998, p. 444–445, pl. 1, figs. 1–6; Zielinski and Gersonde, 2002, p. 261, pl. 2, figs. 1–7;  
 Zielinski et al., 2002, pl. 1, figs. 1–7.
- Rouxia naviculoides* Schrader, 1973, p. 710, pl. 3, figs. 27–32; McCollum, 1975, p. 535, pl. 11, figs. 14, 15; Schrader, 1976,  
 p. 636, pl. 5, figs. 13, 18; Gombos, 1977, p. 597, pl. 7, figs. 10, 11; Gersonde and Burckle, 1990, p. 782, pl. 4, fig. 16;
- 135 Harwood et al., 2000, p. 460, fig. 9r; Zielinski and Gersonde, 2002, p. 261, pl. 2, figs. 8, 9.
- Shionodiscus oestrupii* (Ostenfeld) Alverson et al., 2006, p. 258. **Synonym:** *Thalassiosira oestrupii* (Ostenfeld) Proschkina-  
 Lavrenko; Fenner et al., 1976, p. 780, pl. 9, figs. 1–11; Gombos, 1977, p. 598, pl. 5, figs. 1, 2; Akiba, 1982, p. 46, pl. 4,  
 figs. 2a, 2b, 8–10; Koizumi, 1982, p. 81, pl. 2, figs. 1–3; Akiba, 1986, p. 446, pl. 14, figs. 1–6; Gersonde and Burckle,  
 1990, p. 782, pl. 3, figs. 13, 14; Harwood and Maruyama, 1992, p. 708, pl. 16, figs. 5–7; Bohaty et al., 1998, pl. 2, fig. 3;
- 140 Censarek and Gersonde, 2002, p. 353, pl. 5, figs. 9, 10; Iwai and Winter, 2002, p. 13, pl. 26, figs. 6a, 6b; *Thalassiosira*  
*oestrupii* (Ostenfeld) Hasle; Johansen and Fryxell, 1985, p. 173, figs. 9, 75, 76.
- Shionodiscus tetraoestrupii* (Bodén) Alverson et al., 2006, p. 260. **Basionym:** *Thalassiosira tetraoestrupii* Bodén, 1993, p. 63,  
 67, pl. 1, figs. A–G, pl. 2, figs. A, B, H, J; Iwai and Winter, 2002, p. 13, pl. P16, figs. 8, 9; pl. 27, fig. 7.
- Stellarima microtrias* Hasle and Sims, 1986, p. 111, figs. 18–21 (vegetative), figs. 22–27 (resting spores); Hasle et al., 1988,  
 145 p. 196–198, figs. 1–25.
- Stephanopyxis* spp.
- Synedropsis* spp.
- Thalassionema nitzschioides* (Grunow) Hustedt; Schrader, 1973, p. 712, pl. 23, figs. 2, 6, 9, 10; Akiba, 1986, p. 445, pl. 21,  
 figs. 11, 19; Hallegraeff, 1986, p. 58, figs. 1–4; Moreno-Ruiz and Licea, 1995, p. 396, figs. 1–3, 34–38.
- 150 *Thalassiosira complicata* Gersonde, 1991, pp. 150, 151, pl. 3, figs. 1, 2, pl. 5, figs. 18–20, pl. 6, figs. 1–6, pl. 7, figs. 1–5;  
 Gersonde and Burckle, 1990, p. 782, pl. 4, figs. 1, 2; Harwood and Maruyama, 1992, p. 707, pl. 14, figs. 18–21; Iwai and  
 Winter, 2002, p. 11–12, pl. 11, figs. 1–9; pl. 12, fig. 1, pl. 26, fig. 3; Zielinski and Gersonde, 2002, p. 263, pl. 4, figs. 3, 4.
- Thalassiosira convexa* var. *aspinosa* Schrader, 1974, p. 916, pl. 2, figs. 8, 9, 13–21; Gersonde, 1990, p. 793, pl. 2, figs. 2, 5,  
 pl. 4, figs. 2–4.
- 155 *Thalassiosira fasciculata* Harwood and Maruyama, 1992, p. 707, pl. 15, figs. 4–6; Zielinski and Gersonde, 2002, p. 263, pl. 5,  
 figs. 3, 4.
- Thalassiosira frenguelli* Kozlova; Johansen and Fryxell, 1985, p. 161, 168, figs. 6, 64; Scott and Thomas, 2005, p. 96, pl. 1,  
 fig. 5.
- Thalassiosira gravida* Cleve; Johansen and Fryxell, 1985, p. 170, figs. 27, 43; Akiba, 1986, p. 445, pl. 10, figs. 1–4.
- 160 *Thalassiosira insignis* (Jousé) Harwood and Maruyama, 1992, p. 707, pl. 14, figs. 3–5; Zielinski and Gersonde, 2002, p. 264,  
 pl. 5, figs. 14, 15. **Basionym:** *Cosmiodiscus insignis* Jousé; McCollum, 1975, p. 527, pl. 8, fig. 5; Gombos, 1977, p. 593,  
 pl. 4, figs. 4, 5; Ciesielski, 1986, p. 876, pl. 1, figs. 1–5

- Thalassiosira inura* Gersonde, 1991, p. 151, pl. 6, figs. 7–14; pl. 8, figs. 1–6; Gersonde and Burckle, 1990, p. 782, pl. 3, figs. 15–17, pl. 5, fig. 14; Harwood and Maruyama, 1992, p. 707, pl. 5, fig. 14, pl. 14, figs. 12–16; Bohaty et al., 1998, pl. 4, fig. 8; Harwood et al., 2000, p. 460, fig. 7b; Censarek and Gersonde, 2002, p. 353, pl. 4, figs. 11, 12; Iwai and Winter, 2002, p. 12, pl. 12, figs. 2, 3, pl. 26, figs. 8, 9, pl. 27, fig. 3; Zielinski and Gersonde, 2002, p. 264, pl. 5, figs. 12, 13.
- Thalassiosira kolbei* (Jousé) Gersonde, 1990, p. 793, pl. 1, fig. 2, pl. 5, figs. 3, 5, 6; Gersonde and Burckle, 1990, p. 782, pl. 3, fig. 1; Zielinski and Gersonde, 2002, p. 264, pl. 5, fig. 2. **Basionym:** *Coscinodiscus kolbei* Jousé; McCollum, 1975, p. 527, pl. 4, figs. 7–9; Gombos, 1977, p. 593, pl. 6, fig. 3; Ciesielski, 1986, p. 875, pl. 4, figs. 1–4.
- Thalassiosira lentiginosa* (Janisch) Fryxell; Johansen and Fryxell, 1985, p. 170, figs. 13–14; Harwood and Maruyama, 1992, p. 707, pl. 19, fig. 15; Bohaty et al., 1998, pl. 3, fig. 3; Iwai and Winter, 2002, p. 13, pl. 20, figs. 1, 4, pl. 24, fig. 4. **Basionym:** *Coscinodiscus lentiginosus* Janisch; McCollum, 1975, p. 527, pl. 5, fig. 1; Fenner et al., 1976, p. 773, pl. 7, figs. 4–6; Gombos, 1977, p. 593, pl. 3, figs. 4, 5
- Thalassiosira oliverana* (O'Meara) Sournia; Harwood and Maruyama, 1992, p. 708, pl. 14, figs. 1, 2, 6, 11, 17; Harwood et al., 2000, p. 460, fig. 7c.
- Thalassiosira ritscheri* (Hustedt) Hasle; Johansen and Fryxell, 1985, p. 176, figs. 14, 56, 57; Harwood and Maruyama, 1992, p. 708, pl. 16, figs. 1–3.
- Thalassiosira scotia* Fryxell et Hoban; Johansen and Fryxell, 1985, p. 176, figs. 25, 26, 40–42.
- Thalassiosira striata* Harwood and Maruyama, 1992, p. 708, pl. 15, figs. 7–9; Iwai and Winter, 2002, p. 13, pl. 15, fig. 4, pl. 27, fig. 2; Zielinski and Gersonde, 2002, p. 264, pl. 4, fig. 7.
- Thalassiosira torokina* Brady, 1977, p. 122–123, figs. 1–5; Ciesielski, 1983, p. 657, pl. 7, figs. 3–6. Iwai and Winter, 2002, p. 13, pl. 10, figs. 1a, 1b, pl. 15, figs. 6a–6c, 7a, 7b; pl. 24, fig. 6.
- Thalassiosira tumida* (Janisch) Hasle; Fenner et al., 1976, p. 780, pl. 10, figs. 6, 7; Akiba, 1982, p. 46, pl. 4, figs. 1a, 1b; Bohaty et al., 1998, pl. 2, fig. 1.
- Thalassiosira vulnifica* (Gombos) Fenner emend Mahood et Barron; Harwood and Maruyama, 1992, p. 702, pl. 15, fig. 1; Mahood and Barron, 1996, pp. 285, 287, figs. 1–14, 25, 26; Iwai and Winter, 1992, p. 708, pl. 15, fig. 1; Zielinski and Gersonde, 2002, p. 264, pl. 5, figs. 10, 11. **Basionym:** *Coscinodiscus vulnificus* Gombos, 1977, p. 593, pl. 4, figs. 1–3, pl. 42, figs. 1, 2; Ciesielski, 1983, p. 656, pl. 6, figs. 7, 8.
- Thalassiothrix antarctica* Schimper ex Karsten; Hasle and Semina, 1987, p. 181, 184, figs. 26–59; Scott and Thomas, 2005, p. 147, figs. 2.81a–e.
- Thalassiothrix miocenica* Schrader, 1973, p. 713, pl. 23, fig. 2.
- Triceratium* spp.
- Trichotoxon reinboldii* (Van Heurck) Reid and Round; Hasle and Syvertsen, 1996, p. 267, pl. 58; Scott and Thomas, 2005, p. 147, figs. 2.82a, b. **Basionym:** *Synedra reinboldii* van Heurck; Hasle and Semina, 1987, p. 189, figs. 67–75.

*Cycladophora pliocenica* Lombardi and Lazarus, 1988, p. 104. **Synonym:** *Clathrocyclas bicornis* Hays, 1965, p.179 pl. 3 fig. 3.

*Desmospyris spongiosa* Hays, 1965, p. 173–175, pl. 2, fig. 1.

200 *Dendrospyris rhodospyroides* (Petrushevskaya) Abelmann, 1990, pl. 5, fig. 9. **Basionym:** *Desmospyris rhodospyroides* Petrushevskaya, 1975, p. 593, pl. 10, fig. 27–29, 31, 32.

*Eucyrtidium calvertense* Martin; Abelmann, 1990, p. 696, pl. 6, figs. 4–5.

*Eucyrtidium pseudoinflatum* Weaver, 1983, p. 675–676, pl. 5, figs. 8–9; Lazarus, 1990, p. 716, pl. 6, figs. 12–14.

*Lampromitra coronata* Haeckel; Keany, 1979, p. 56, pl. 4, fig. 10, pl. 5, fig. 14.

*Larcopyle polyacantha titan* (Campbell and Clark) Lazarus et al., 2005, p. 108, pl. 3, figs. 1–12.

205 *Pseudocubus vema* (Hays) Petrushevskaya. **Basionym:** *Helotholus vema* Hays, 1965, p. 176, pl. 2, fig. 3; Lazarus, 1990, pl. 7, figs. 1–5.

*Siphonosphaera vesuvius* Lazarus, 1992, p. 794–795, pl. 2, figs. 1–8.

## References

210 Abelmann, A.: Oligocene to Middle Miocene Radiolarian stratigraphy of Southern High Latitudes from Leg 113, Sites 689 and 690, Maud Rise. in: Proceedings of the Ocean Drilling Program, Scientific Results, vol. 113, edited by Barker, P. F., Kennett, J. P. et al., College Station, TX (Ocean Drilling Program), 675–708, 1990.

Akiba, F.: Late Quaternary diatom biostratigraphy of the Bellingshausen Sea, Antarctic Ocean. Report of the Technology Research Center, Japan National Oil Corporation, 16, 31–74, 1982.

215 Akiba, F.: Middle Miocene to Quaternary diatom biostratigraphy in the Nankai Trough and Japan Trench, and modified Lower Miocene through Quaternary diatom zones for middle-to-high latitudes of the North Pacific. in: Initial Reports of the Deep Sea Drilling Project, vol. 87, edited by: Kagami, H., Karig, D. E., Coulbourn, W. T., et al., U.S. Government Printing Office, Washington D.C., pp. 393–480. <https://doi.org/10.2973/dsdp.proc.87.106.1986>, 1986.

220 Akiba, F., and Yanagisawa, Y.: Taxonomy, morphology and phylogeny of the Neogene diatom zonal marker species in the middle-to-high latitudes of the North Pacific. in: Initial Reports of the Deep Sea Drilling Project, vol. 87, edited by Kagami, H., Karig, D. E., Coulbourn, W. T. et al., U.S. Government Printing Office, Washington D.C., 483–554, <https://doi.org/10.2973/dsdp.proc.87.107.1986>, 1986

Al-Handal, A. Y. and Wulff, A.: Marine benthic diatoms from Potter Cove, King George Island, Antarctica. *Botanica Marina*, 51, 51–68, <https://doi.org/10.1515/BOT.2008.007>, 2008.



- 225 Alverson, A. J., Kang, S.-H., and Theriot, E. C.: Cell Wall Morphology and Systematic Importance of *Thalassiosira Ritscheri* (hustedt) Hasle, with a Description of *Shionodiscus* gen. nov., Diatom Res., 21, 251–262, <https://doi.org/10.1080/0269249X.2006.9705667>, 2006.
- Armand, K. L. and Zielinski, U.: Diatom species of the genus *Rhizosolenia* from Southern Ocean sediments: Distribution and taxonomic notes. Diatom Research, 16, 259–294, <https://doi.org/10.1080/0269249X.2001.9705520>, 2001.
- 230 Baldauf, J. G., and Barron, J. A.: Diatom biostratigraphy: Kerguelen Plateau and Prydz Bay regions of the Southern Ocean. in: Proceedings of the Ocean Drilling Program, Scientific Results, vol. 119, edited by: Barron, J., Larsen, B. et al., College Station, TX (Ocean Drilling Program), pp. 547–598. <https://doi.org/10.2973/odp.proc.sr.119.135.1991>, 1991.
- Bodén, P.: Taxonomy and stratigraphic occurrence of *Thalassiosira tetraoestrupii* sp. nov. and related species in upper Miocene and lower Pliocene sediments from the Norwegian Sea, North Atlantic and North West Pacific. Terra Nova, 5, 235 61–75, <https://doi.org/10.1111/j.1365-3121.1993.tb00227.x>, 1993
- Bohaty, S., Scherer, R., and Harwood, D. M.: Quaternary diatom biostratigraphy and palaeoenvironments of the CRP-1 drillcore, Ross Sea, Antarctica. Terra Antarctica, 5, 431–453, 1998.
- Brady, H. T.: *Thalassiosira torokina* n. sp. (diatom) and its significance in Late Cenozoic biostratigraphy. Antarctic Journal, 12, 122–123, 1977.
- 240 Censarek, B., and Gersonde, R.: Miocene diatom biostratigraphy at ODP Sites 689, 690, 1088, 1092 (Atlantic sector of the Southern Ocean), Mar. Micropaleontol., 45, 309–356, [https://doi.org/10.1016/S0377-8398\(02\)00034-8](https://doi.org/10.1016/S0377-8398(02)00034-8), 2002.
- Ciesielski, P. F.: The Neogene and Quaternary diatom biostratigraphy of subantarctic sediments, Deep Sea Drilling Project Leg 71. in: Initial Reports of the Deep Sea Drilling Project, vol. 71, edited by Ludwig, W. J., Krasheninnikov, V. A. et al., U.S. Government Printing Office, Washington D.C., 635–666, <https://doi.org/10.2973/dsdp.proc.71.125.1983>, 1983.
- 245 Ciesielski, P. F.: Middle Miocene to Quaternary diatom biostratigraphy of Deep Sea Drilling Project Site 594, Chatham Rise, southwest Pacific. in: Initial Reports of the Deep Sea Drilling Project, vol. 90, edited by Kennett, J. P., von der Borch, C. C. et al., U.S. Government Printing Office, Washington D.C., 863–885, <https://doi.org/10.2973/dsdp.proc.90.115.1986>, 1986.
- Fenner, J. M.: Late Pliocene–Quaternary quantitative diatom stratigraphy in the Atlantic sector of the Southern Ocean. in: 250 Proceedings of the Ocean Drilling Program, Scientific Results, vol. 114, edited by Ciesielski, P. F., Kristoffersen, Y. et al., Ocean Drilling Program, College Station, TX, 97–121, <https://doi.org/10.2973/odp.proc.sr.114.133.1991>, 1991.
- Fenner, J., Schrader, H.-J., Wienigk, H.: Diatom phytoplankton studies in the southern Pacific Ocean, composition and correlation to the Antarctic convergence and its paleoecological significance. in: Initial Reports of the Deep Sea Drilling Project, vol. 35, edited by Hollister, C.D. et al., U.S. Government Printing Office, Washington D.C., 757–813, 255 <https://doi.org/10.2973/dsdp.proc.35.app3.1976>, 1976.
- Fryxell, G. A., Sims, P. A., and Watkins, T. P.: *Azpeitia* (Bacillariophyceae): related genera and promorphology. Systematic Botany Monographs, 13, 1–73, 1986.

- 260 Gersonde, R.: Taxonomy and morphostructure of Neogene diatoms from the Southern Ocean, ODP Leg 113. in: Proceedings of the Ocean Drilling Program, Scientific Results, vol. 113, edited by Barker, P.F., Kennett, J.P. et al., Ocean Drilling Program, College Station, TX, 791–802, <https://doi.org/10.2973/odp.proc.sr.113.128.1990>, 1990.
- Gersonde, R.: Taxonomy and morphostructure of late Neogene diatoms from the Maude Rise (Antarctic Ocean). *Polarforschung*, 59, 141–171, 1991.
- Gersonde, R. and Burckle, L. H.: Neogene Diatom Biostratigraphy of ODP Leg 113, Weddell Sea (Antarctic Ocean), in: Proceedings of the Ocean Drilling Program, Scientific Results, vol. 113, edited by Barker, P. F., Kennett, J. P. et al., 265 College Station, TX (Ocean Drilling Program), 761–789, <https://doi.org/10.2973/odp.proc.sr.113.126.1990>, 1990.
- Gersonde, R., and Bárcena, M. A.: Revision of the upper Pliocene: Pleistocene diatom biostratigraphy for the northern belt of the Southern Ocean. *Micropaleontol.*, 44, 84–98, <https://doi.org/10.2307/1486086>, 1998.
- Gombos, A. M., Jr.: New species of fossil diatoms from the Antarctic. *Antarctic Journal of the United States*, 9, 275, 1974.
- Gombos, A. M., Jr.: Paleogene and Neogene diatoms from the Falkland Plateau and Malvinas Outer Basin: Leg 36, Deep 270 Sea Drilling Project. in: Initial Reports of the Deep Sea Drilling Project, vol. 36, edited by Barker, P., Dalziel, I. W. D., et al., Washington (U.S. Govt. Printing Office), 575–687, 1977.
- Hallegraeff, G.: Taxonomy and morphology of the marine plankton diatoms *Thalassionema* and *Thalassiothrix*. *Diatom Research*, 1, 57–80, <https://doi.org/10.1080/0269249X.1986.9704958>, 1986.
- Hanna, G. D.: A review of the genus *Rouxia*. *Journal of Paleontology*, 4, 179–188, 1930.
- 275 Harwood, D. M., and Maruyama, T.: Middle Eocene to Pleistocene diatom biostratigraphy of Southern Ocean sediments from the Kerguelen Plateau, Leg 120. in: Proceedings of the Ocean Drilling Program, Scientific Results, vol. 120, edited by Wise, S. W., Jr., Schlich, R. et al., College Station, TX (Ocean Drilling Program), 683–733, <https://doi.org/10.2973/odp.proc.sr.120.160.1992>, 1992.
- Harwood, D. M., McMinn, A., and Quilty, P. G.: Diatom biostratigraphy and age of the Pliocene Sarrsdal Formation, 280 Vestfold Hills, East Antarctica. *Antarctic Science*, 12, 443–462, 2000.
- Hasle, G. R. and Sims, P. A.: The diatom genera *Stellarima* and *Symbolophora* with comments on the genus *Actinoptychus*. *British Phycological Journal*, 21, 97–114, <https://doi.org/10.1080/00071618600650101>, 1986.
- Hasle, G. R. and Semina, H. J.: The marine planktonic diatoms *Thalassiothrix longissima* and *Thalassiothrix antarctica* with comments on *Thalassionema* spp. and *Synedra reinboldii*. *Diatom Research*, 2, 175–192, 285 <https://doi.org/10.1080/0269249X.1987.9704996>, 1987.
- Hasle, G. R. and Medlin, L. K.: Family Bacillariaceae: Genus *Nitzschia* section *Fragilariopsis*. in: *Polar Marine Diatoms*, edited by Medlin, L. K. and Priddle, J., British Antarctic Survey, 181–196, 1990.
- Hasle, G. R. and Syvertsen, E. E.: Marine diatoms. in: *Identifying Marine Phytoplankton*, edited by Tomas, C. R., Academic Press, San Diego, 5–385, 1996.

- 290 Hasle, G. R., Sims, P. A., and Syvertsen, E. E.: Two recent *Stellarima* species: *S. microtrias* and *S. stellaris* (Bacillariophyceae). *Botanica Marina*, 31, 195–206, <https://doi.org/10.1515/botm.1988.31.3.195>, 1988.
- Hays, J. D.: Radiolaria and late Tertiary and Quaternary history of Antarctic seas. American Geophysical Union, *Biology of Antarctic Seas*, vol. 2, Antarctic Research Series, 5, 125–184, 1965.
- Iwai, M., and Winter, D.: Data report: taxonomic notes of Neogene diatoms from the western Antarctic peninsula: Ocean  
295 Drilling Program Leg 178. in: *Proceedings of the Ocean Drilling Program, Scientific Results*, vol. 178, edited by Barker, P. F., Camerlenghi, A., Acton, G. D., and Ramsay, A. T. S., College Station, TX (Ocean Drilling Program), pp. 1–57. <https://doi.org/10.2973/odp.proc.sr.178.239.2002>, 2002.
- Johansen, J. R. and Fryxell, G. A.: The genus *Thalassiosira* (Bacillariophyceae): studies on species occurring south of the Antarctic Convergence Zone. *Phycologia*, 24, 155–179, <https://doi.org/10.2216/i0031-8884-24-2-155.1>, 1985.
- 300 Jordan, R. W., and Priddle, J.: Fossil members of the diatom genus *Proboscia*, *Diatom Res.*, 6, 55–61, <https://doi.org/10.1080/0269249X.1991.9705147>, 1991.
- Keany, J.: Early Pliocene radiolarian taxonomy and biostratigraphy in the Antarctic region. *Micropaleontology*, 25, 50–74, 1979.
- Koizumi, I.: Late Quaternary diatoms of the Bellingshausen Basin, Antarctic Ocean. Representative Technical Research,  
305 Central Japanese National Oil Corporation, 16, 75–90, 1982.
- Lazarus, D.: Middle Miocene to Recent Radiolarians from the Weddell Sea, Antarctica, ODP Leg 113, in: *Proceedings of the Ocean Drilling Program, Scientific Results*, vol. 113, edited by Barker, P. F., Kennett, J. P. et al., College Station, TX (Ocean Drilling Program), 709–727, <https://doi.org/10.2973/odp.proc.sr.113.132.1990>, 1990.
- Lazarus, D.: Antarctic Neogene radiolarians from the Kerguelen Plateau, Legs 119 and 120, in: *Proceedings of the Ocean  
310 Drilling Program, Scientific Results*, vol. 120, edited by: Wise, S. W., Jr., Schlich, R., et al., College Station, TX (Ocean Drilling Program), 785–802, <https://doi.org/10.2973/odp.proc.sr.120.192.1992>, 1992.
- Lazarus, D., Faust, K., and Popova-Goll, I.: New species of prunoid radiolarians from the Antarctic Neogene. *Journal of Micropaleontology*, 24, 97–121, 2005.
- Lombardi, G., and Lazarus, D.: Neogene cycladophorid radiolarians from North Atlantic, Antarctic, and North Pacific deep-  
315 sea sediments. *Micropaleontology*, 34(2), 97–135, 1988.
- Mahood, A. D. and Barron, J. A.: Comparative ultrastructure of two closely related *Thalassiosira* species: *Thalassiosira vulnifica* (Gombos) Fenner and *T. fasciculata* Harwood et Maruyama. *Diatom Research*, 11, 283–295. <https://doi.org/10.1080/0269249X.1996.9705385>, 1996.
- McCollum, D. W.: Diatom stratigraphy of the Southern Ocean, in: *Initial Reports of the Deep Sea Drilling Project*, vol. 28,  
320 edited by Hayes, D. E., Frakes, L. A., et al., U.S. Government Printing Office, Washington D.C., 515–571, <https://doi.org/10.2973/dsdp.proc.28.112.1975>, 1975.

- Moreno-Ruiz, J. L. and Licea, S.: Observations on the valve morphology of *Thalassionema nitzschioides* (Grunow) Hustedt. in: Proceedings of the 13th International Diatom Symposium, edited by Montresor, M. and Marino, D., Biopress, Bristol, 393–413, 1996.
- 325 Petrushevskaya, M. G.: Cenozoic radiolarians of the Antarctic, Leg 29, Deep Sea Drilling Project. in: Initial Reports of the Deep Sea Drilling Project, vol. 29, edited by Kennett, J. P., Houtz, R. E., et al., Washington (U.S. Govt. Printing Office), 541–676, 1975.
- Schrader, H.-J.: Cenozoic diatoms from the northeast Pacific, Leg 18, in: Initial Reports of the Deep Sea Drilling Project, vol. 18, edited by Kulm, L.D., von Huene, R. et al., U.S. Government Printing Office, Washington D.C., 673–797, 330 <https://doi.org/10.2973/dsdp.proc.18.117.1973>, 1973.
- Schrader, H.-J.: Cenozoic marine planktonic diatoms stratigraphy of the tropical Indian Ocean. in: Initial Reports of the Deep Sea Drilling Project, vol. 24, edited by Fisher, R. L., Bunce, E. T., et al., U.S. Government Printing Office, Washington D.C., 887–967, <https://doi.org/10.2973/dsdp.proc.24.122.1974>, 1974.
- Schrader, H.-J.: Cenozoic planktonic diatom stratigraphy of the Southern Pacific Ocean, in: Initial Reports of the Deep Sea 335 Drilling Project, vol. 35, edited by Hollister, C. D., Craddock, C. et al., U.S. Government Printing Office, Washington D.C., 605–671, 1976.
- Scott, F. J., and Thomas, D. P.: Diatoms. in: Antarctic Marine Protists, edited by Scott, F. J. and Marchant, H. J., Australian Biological Resources Study, Canberra, 13–201, 2005.
- Sjunneskog, C., Riesselman, C., Winter, D., and Scherer, R.: *Fragilariopsis* diatom evolution in Pliocene and Pleistocene 340 Antarctic shelf sediments, *Micropaleontology*, 58, 273–289, 2012.
- Sundström, B. G.: The marine diatom genus *Rhizosolenia*—a new approach to the taxonomy. Lund University (Ph.D. thesis), Sweden, 1986.
- Weaver, F. M.: Cenozoic radiolarians from the Southwest Atlantic, Falkland Plateau region, Deep Sea Drilling Project Leg 71. in: Initial Reports of the Deep Sea Drilling Project, vol. 71, edited by Ludwig, W. J., Krasheninnikov, V. A., et al., 345 Washington (U.S. Govt. Printing Office), 667–686, 1983.
- Winter, D., Sjunneskog, C., Scherer, R., Maffioli, P., Riesselman, C., and Harwood, D.: Pliocene–Pleistocene diatom biostratigraphy of nearshore Antarctica from the AND-1B drillcore, McMurdo Sound, *Glob. Planet. Change*, 96–97, 59–74, <https://doi.org/10.1016/j.gloplacha.2010.04.004>, 2012.
- Yanagisawa, Y., and Akiba, F.: Taxonomy and phylogeny of the three marine diatom genera, *Crucidentricula*, *Denticulopsis* 350 and *Neodenticula*, *Bulletin of the Geological Survey of Japan*, 41, 197–301, <http://dl.ndl.go.jp/info:ndljp/pid/9621404>, 1990.
- Zielinski, U., and Gersonde, R.: Plio-Pleistocene diatom biostratigraphy from ODP Leg 177, Atlantic sector of the Southern Ocean. *Mar. Micropaleontol.*, 45, 225–268, [https://doi.org/10.1016/S0377-8398\(02\)00031-2](https://doi.org/10.1016/S0377-8398(02)00031-2), 2002.

Zielinski, U., Bianchi, C., Gersonde, R., and Kunz-Pirrung, M.: Last occurrence datums of the diatoms *Rouxia leventerae* and *R. constricta*: indicators for marine isotope Stages 6 and 8 in Southern Ocean sediments. *Marine Micropaleontology*, 46, 127–137, [https://doi.org/10.1016/S0377-8398\(02\)00042-7](https://doi.org/10.1016/S0377-8398(02)00042-7), 2002.
